1 TITLE:

2 Inferring the role of habitat dynamics in driving diversification: evidence for a species pump  
3 in Lake Tanganyika cichlids

4 AUTHORS: Thijs Janzen<sup>1,2\*</sup>, Rampal S. Etienne<sup>2</sup>

5

6 AUTHOR AFFILIATION

7 1. Max Planck Institute for Evolutionary Biology, Department of Evolutionary Theory,  
8 August-Thienemann-Straße 2, 24306, Plön, Germany.

9 2. University of Groningen, Groningen Institute for Evolutionary Life Sciences, Box  
10 11103, 9700 CC Groningen, The Netherlands

11

12 \*Corresponding author: Thijs Janzen, Max Planck Institute for Evolutionary Biology,  
13 Department of Evolutionary Theory, August-Thienemann-Straße 2, 24306, Plön,  
14 Germany, e-mail: thijsjanzen@gmail.com

15

16 ABSTRACT

17 Geographic isolation that drives speciation is often assumed to slowly increase over time, for  
18 instance through the formation of rivers, the formation of mountains or the movement of  
19 tectonic plates. Cyclic changes in connectivity between areas may occur with the  
20 advancement and retraction of glaciers, with water level fluctuations in seas between islands  
21 or in lakes that have an uneven bathymetry. These habitat dynamics may act as a driver of  
22 allopatric speciation and propel local diversity. Here we present a parsimonious model of the  
23 interaction between cyclical (but not necessarily periodic) changes in the environment and  
24 speciation, and provide an ABC-SMC method to infer the rates of allopatric and sympatric  
25 speciation from a phylogenetic tree. We apply our approach to the posterior sample of an  
26 updated phylogeny of the *Lamprologini*, a tribe of cichlid fish from Lake Tanganyika where  
27 such cyclic changes in water level have occurred. We find that water level changes play a  
28 crucial role in driving diversity in Lake Tanganyika. We note that if we apply our analysis to  
29 the Most Credible Consensus tree, we do not find evidence for water level changes  
30 influencing diversity in the *Lamprologini*, suggesting that the MCC tree is a misleading  
31 representation of the true species tree. Furthermore, we note that the signature of habitat  
32 dynamics is found in the posterior sample despite the fact that this sample was constructed  
33 using a species tree prior that ignores habitat dynamics. However, in other cases this species  
34 tree prior might erase this signature. Hence we argue that in order to improve inference of the  
35 effect of habitat dynamics on biodiversity, phylogenetic reconstruction methods should  
36 include tree priors that explicitly take into account such dynamics.

37

38

39 INTRODUCTION

40

41 Environmental changes such as the formation of mountain ridges, the formation of rivers and  
42 the movement of tectonic plates have long been known to be important drivers of speciation  
43 (Coyne and Orr 2004). Repeated environmental changes may thus lead to diversification  
44 patterns. For instance, the spatially explicit model of landscape fragmentation and hence  
45 splitting of geographic ranges of Pigot et al. (2010) explains a large part of the features of the  
46 reconstructed avian trees. Aguilée et al (2011, 2013) studied cyclic changes in the  
47 environment in particular and showed that they may present an alternative driver of diversity.  
48 Cyclic changes in the environment can cause populations to continuously switch between an  
49 allopatric and sympatric stage, providing a continuously renewed potential for speciation.  
50 These cyclic changes can in turn drive diversity towards levels unexpected given the current  
51 geography, and are sometimes referred to as a “species pump”. Examples of species pumps  
52 are environmental fluctuations fragmenting habitat on the slopes of mountains (Weir 2006;  
53 Sedano and Burns 2010; Hutter et al. 2013), glaciations and postglacial secondary contacts  
54 (Barnosky 2005), sea level changes causing the fusion and fragmentation of islands (Glor et  
55 al. 2004; Thorpe et al. 2008, but see Papadopoulou and Knowles 2015), and fluctuations in  
56 water level causing fragmentation and fusion of lakes with uneven bathymetry, as in the  
57 African Rift Lakes (Cohen et al. 1997b; Alin et al. 1999; Ivory et al. 2016).

58

59 The African Rift Lakes provide a good starting point in studying the interplay between cyclic  
60 habitat dynamics and speciation, because they have been subject to frequent water level  
61 changes (Cohen et al. 1997b; Alin and Cohen 2003; Ivory et al. 2016), which potentially  
62 influenced fish diversity in the lakes. An estimated number of 2000 cichlid fish species have

63 evolved in the African Rift Lakes over the past 10 million years (Turner et al. 2001), and  
64 comprise one of the most spectacular adaptive radiations (Seehausen 2006). The most  
65 prominent water level changes took place in Lake Tanganyika, where the water level has  
66 dropped over 600 meters on multiple occasions over the past million years, splitting the lake  
67 into multiple smaller lakes (Lezzar et al. 1996; Cohen et al. 1997a, 2007). Being the oldest  
68 lake of the three large rift lakes (Cohen et al. 1993), Lake Tanganyika contains the highest  
69 behavioral diversity (Konings 2007) and it is the only lake with a highly resolved phylogeny  
70 for cichlid fish. Micro-satellite analysis indicates that in several genera, populations are  
71 aligned with the location of the smaller lakes at low water level, suggesting the influence of  
72 water level changes on population segregation and speciation (Taylor et al. 2001; Koblmüller  
73 et al. 2011; Nevado et al. 2013).

74 Aguilée et al. (2013) developed a model for the African Rift Lakes in which populations at  
75 different locations diverge from each other depending on the local habitat, and at the same  
76 time allowed for sympatric speciation by implementing assortative mating that allows for a  
77 single branching point in trait values. Over time the different locations become separated or  
78 are reconnected, and this may drive the formation of new species. The authors conclude that  
79 stable numbers of diversity are best obtained by a fragmented habitat with recurrent merged  
80 states and rapid fluctuations. However, Aguilée et al. (2013) do not compare their results to  
81 empirical data.

82

83 Here, we provide a method to infer whether or how cyclic changes in the environment  
84 influence both the generation and the maintenance of biodiversity. We use an extension of the  
85 standard constant-rates birth-death model. Because deriving an expression for the likelihood  
86 of this model for a given set of phylogenetic branching times is difficult, but simulation of

87 phylogenies under the model is easy, we used approximate Bayesian computation (ABC)  
88 based on sequential Monte Carlo sampling (SMC) to estimate parameters from phylogenies.  
89 We applied our approach to an updated phylogeny of the *Lamprologini*, a tribe of cichlid fish  
90 from Lake Tanganyika in order to assess the importance of these habitat dynamics in shaping  
91 the current biodiversity of cichlids in Lake Tanganyika.

92

93

94

95 **METHODS**

96 *Model*

97 To model the interaction between environmental change and speciation, we envisage a lake  
98 that consists of a single pocket at high water level, but that splits into two pockets when the  
99 water level drops. When the water level drops, we assume that all species distribute  
100 themselves equally over the two pockets; similarly, when the water level rises, all species  
101 previously contained in the two pockets are combined into the single pocket. Allopatric  
102 speciation can only occur when the water level is low. After an exponentially distributed  
103 waiting time, one of the two incipient species in either pocket can speciate into a new species.  
104 If this allopatric speciation does not occur before the water level rises again, i.e. reflecting  
105 that there has not been enough genetic divergence, the two incipient species in the two  
106 pockets merge back into one species. This is conceptually similar to the idea of protracted  
107 speciation (Etienne and Rosindell 2012): the water level drop initiates the speciation process  
108 whereas the allopatric speciation event is the completion of speciation under the protracted  
109 speciation model. Sympatric speciation can always occur in our model, either at high water  
110 level in the lake, or in both pockets when the water level is low. Extinction is considered to  
111 be a background process that occurs locally, i.e. within a pocket. If the water level is high,  
112 this causes extinction of a species, if the water level is low, this causes local extinction in one  
113 of the pockets.

114 We implemented our model using a Gillespie algorithm, where the time steps are chosen  
115 depending on the rate of possible events. In the model there are five possible events:

- 116 1) A water level change event, inducing incipient species or merger of incipient species.
- 117 2) Sympatric speciation event at high water level, with rate  $\lambda_s^h$
- 118 3) Sympatric speciation event at low water level, with rate  $\lambda_s^l$

119 4) Allopatric speciation(-completion) event, at low water level, with rate  $\lambda_a^l$

120 5) Extinction event, with rate  $\mu$

121 When the water level drops, all species distribute themselves over both pockets. Thus,  
122 immediately after a water level drop, the number of incipient species is equal to twice the  
123 number of species. When the water level rises, all incipient species that belong to the same  
124 species merge into a single species. During a sympatric speciation event, a single species  
125 splits into two new species, and the original (incipient) species is consumed in the process. If  
126 sympatric speciation occurs when the water level is low, the species in the other pocket is  
127 retained, and thus three new lineages arise: the first branching point occurs at the water level  
128 drop while the second occurs at the sympatric speciation event (Figure 1).

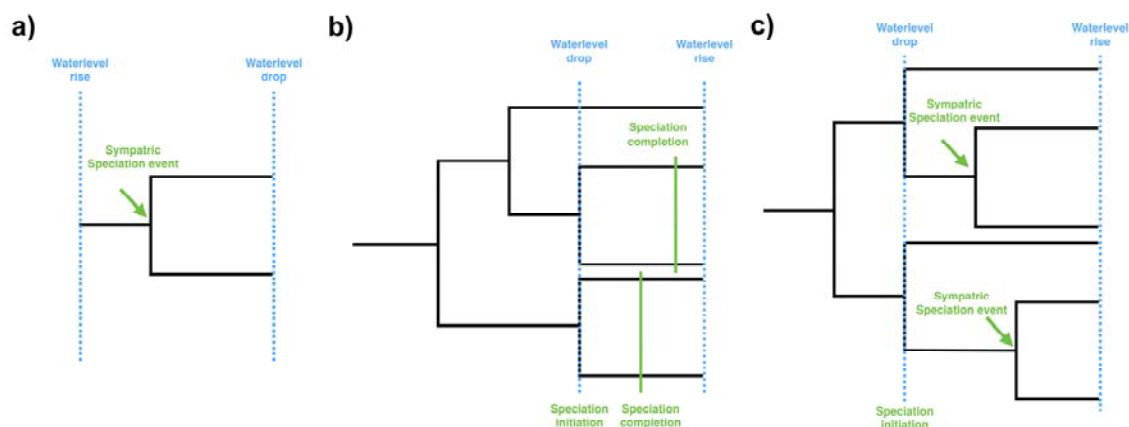

129

130 Figure 1. Schematic representation of the consequences of the three different types of  
131 speciation on phylogeny. Time proceeds from left to right. The dotted blue lines indicate  
132 water level changes. (a) During a sympatric speciation at high water level event,  
133 diversification is not aligned with any associated water level change. (b) During allopatric  
134 speciation at low water level, speciation initiation coincides with the water level drop,  
135 causing branching events (if speciation-completion occurs before water level rise) to line up  
136 in time. Branching events are independent of the time of speciation completion, hence, even  
137 when the actual speciation completion events occur at different time points, branching events  
138 in the species tree are identical. (c) During a sympatric speciation event at low water,  
139 the speciation event is independent of the water level changes. Because the original species is  
140 consumed in the process, a new branching event is also added at the water level change event.  
141 Hence, both speciation-completion (b) and sympatric speciation at low water level (c) cause  
142 branching times to line up at the time of water level drop.

143 During an extinction event, one (possibly incipient) species is removed from the simulation.  
144 If the water level is low, this need not lead to the extinction of a species, because the sister  
145 incipient species might remain in the other pocket, ensuring survival of the species.

#### 146 *Maximum Likelihood*

147 Without water level changes, our model reduces to the constant rates birth-death model (Nee  
148 et al. 1994). As a reference therefore, we estimated parameters of the standard birth-death  
149 model using Maximum Likelihood. The likelihood of the birth-death model was calculated  
150 using the function “bd\_ML” from the R package DDD. (Etienne et al. 2012).

151

#### 152 **Fitting the model to empirical data**

153 We performed two different fitting procedures: firstly, we performed a model selection  
154 procedure, where three different water level scenarios were fitted simultaneously to the data  
155 (more information about the chosen scenarios can be found in the next section). Hence, the  
156 model selection procedure simultaneously estimates parameter estimates and assesses the fit  
157 of the models (fraction of particles associated with each model). However, because all  
158 particles are often assigned only to the best fitting model, the model selection procedure does  
159 not always allow for the comparison of parameter estimates across different models.  
160 Therefore, we also fitted the three different water level scenarios independently to the  
161 empirical data, and obtained posterior distributions for the parameters relevant to these  
162 scenarios.

163 We fitted our model to 100 trees randomly sampled from the MCMC chain obtained from the  
164 \*BEAST analysis (see below), and to the Most Credible Consensus (MCC) tree.

#### 165 *Water level scenarios*



166 The main focus of our approach is to assess the impact of water level changes on the  
167 diversification rate. Lake Tanganyika experienced low water level stands 35 - 40 kyears ago,  
168 169 - 193 kya, 262 - 295 kya, 363 - 393 kya and 550 - 1100 kya (Lezzar et al. 1996; Cohen et  
169 al. 1997a). Consequently, high water levels occurred between 0 – 35 kya, 40 – 169 kya, 193 –  
170 262 kya, 295 - 363 kya and 393 – 550 kya. Unfortunately the geological record does not  
171 reveal whether any low water level stands occurred beyond 1.1 million years ago. This leaves  
172 us with two alternative scenarios: either no low water level stands occurred beyond 1.1  
173 million years ago, or these low water level stands have not been preserved accurately in the  
174 geological record.

175 In order to capture these two scenarios we performed inference using two alternative water  
176 level implementations. Firstly we used the exact literature values, assuming a high water  
177 level stand until 1.1 million years ago. We refer to this scenario as LW (Literature  
178 Waterlevels). Secondly we assumed that before 1.1. million years ago, water level changes  
179 occurred at the same *average* rate of water level change in the most recent 1.1 million years.  
180 In the recent 1.1 million years the lake experienced 5 high water level stands, and 5 low water  
181 level stands, which amounts to 10 water level changes in total. To extrapolate water level  
182 changes to more than 1.1 million years ago, we drew waiting times until the next water level  
183 change from an exponential distribution with rate 10. We refer to this scenario as EW  
184 (Extrapolated Waterlevels). Thirdly we also tested the null expectation: no water level  
185 changes at all, we refer to this scenario as NW (No Waterlevels). Without water level  
186 changes, the model reduces to the constant-rates birth death model.

187

188 *Parameter estimation*

189 To fit the model to empirical data we used Approximate Bayesian Computation, in  
190 combination with a Sequential Monte Carlo scheme (ABC-SMC) (Toni et al. 2009).  
191 As summary statistics for the ABC analysis we chose the normalized LTT statistic (Janzen et  
192 al. 2015), tree size, Phylogenetic Diversity (Schweiger et al. 2008) and the  $\gamma$  statistic (Pybus  
193 and Harvey 2000). On all parameters ( $\lambda_s^h, \lambda_s^l, \lambda_a^l, \mu$ ) we chose uniform priors  $U(-3, 2)$ , on a  
194  $^{10}\log$  scale, such that the eventual prior distribution spans  $(10^{-3}, 10^2)$ . A  $^{10}\log$  scale was chosen  
195 to avoid parameters to take on values below 0. The standard deviation of the normal  
196 distribution used to perturb the parameters was chosen to have a mean of 0, and a standard  
197 deviation of 0.05 (on the  $^{10}\log$  transformed parameter), and we updated one parameter each  
198 time (e.g. jumps were only made in one dimension, to avoid extremely low acceptance rates).  
199 The number of particles used was 10,000. To assess the fit of the model to the data we  
200 calculated the Euclidian distance between the summary statistic of the simulated data and the  
201 empirical data. To ensure that the differences in summary statistics were on the same scale,  
202 we normalized the differences. Differences were normalized by dividing each difference by  
203 the standard deviation of that summary statistic of 1,000,000 trees simulated using parameter  
204 values sampled from the prior.

205

### 206 *Model selection*

207 To identify which model best explains the data, we performed ABC model selection, as  
208 described in Toni et al. (2009; 2010). The main difference between standard ABC-SMC and  
209 ABC-SMC including model selection is that the latter adds one parameter, which keeps track  
210 of the model. As jumping kernel between models we assumed a 50% probability of staying at  
211 the same model, and a 25% probability of jumping to either other model. This reversible  
212 jump ABC-SMC model selection procedure results in a posterior distribution over the three

213 models, where the model with most support is selected most across all particles. We can  
214 calculate the Bayes factor, by taking the ratio of the number of particles assigned to the  
215 respective models (Toni et al. 2009). For example, the Bayes factor of LW/EW is the number  
216 of particles assigned to the model with literature water level changes divided by the number  
217 of particles assigned to the model with extrapolated water level changes. Because a model  
218 can receive zero particles, we set the Bayes factor for each model compared to the model  
219 with zero particles to the maximum support possible, which is the total number of particles:  
220 10,000. We report the fraction of trees for which each respective model is selected, and we  
221 report the distribution of Bayes factors across all tested trees, as an indication of the support  
222 for each model.

### 223 *Model selection validation*

224 To assess whether our ABC-SMC method can accurately infer the correct model, we  
225 simulated 50 datasets for each model (NW, LW & EW), with parameter values drawn from  
226 the prior. From the accepted particles in the last iteration we then assessed the proportion of  
227 particles belonging to each model, and selected the most frequent model as the most likely  
228 model as inferred by the inference procedure. We report the selected models and the mean  
229 Bayes factors across the 50 replicates.

230

### 231 *Measurement uncertainty*

232 A phylogeny generated with a high rate of allopatric speciation and a high rate of water level  
233 changes tends to have multiple speciation events that are aligned in time (Figure 1, b). This is  
234 due to the fact that the onset of speciation is given by the time of water level change.  
235 Phylogenetic reconstruction methods such as BEAST currently do not allow for simultaneous

236 branching events. Hence, when fitting the model, trees are generated that are by definition  
237 dissimilar from the empirical tree constructed using BEAST, even if underlying events are  
238 close to the original events. To circumvent this we perturbed the branching time of each node  
239 in the simulated tree. In this way speciation events that were previously aligned in time now  
240 occur on slightly different time points, as in a tree from a BEAST analysis. We perturbed  
241 branching times by adding a random number drawn from a truncated normal distribution with  
242 mean 0, standard deviation  $\sigma$ , and as upper and lower limit the branching times of the parent  
243 and daughter lineages respectively. If there were no daughter lineages present, and the node  
244 gave rise to an extant species, the normal distribution was truncated to the present time.  
245 Nodes were perturbed from past to present (leaving the crown in place, to ensure a  
246 phylogenetic tree with the same age as the empirical tree). The standard deviation of the  
247 perturbation kernel was included as an extra parameter to be inferred, with a uniform prior on  
248  $(10^{-3}, 10^2)$ .

249

#### 250 *Empirical data*

251 We fitted our model to the phylogenetic tree of the tribe of *Lamprologini*, the most diverse  
252 tribe within Lake Tanganyika, containing 78 species of cichlids (Day et al. 2007; Koblmüller  
253 et al. 2007; Sturmbauer et al. 2010). The *Lamprologini* are endemic to Lake Tanganyika, and  
254 all species are substrate brooders with shared paternal and maternal care. In contrast to the  
255 mouthbrooding species from the *Haplochromini*, the *Lamprologini* show little sexual  
256 dimorphism and dichromatism, which are well-known indicators for sexual selection  
257 (Kraaijeveld et al. 2011). We therefore expect that the *Lamprologini* is a good candidate for  
258 picking up signals from water level changes.

259 We reconstructed a new *Lamprologini* tree following the workflow of the most complete  
260 *Lamprologini* tree to date, which is a consensus tree based on the mitochondrial ND2 gene  
261 (Sturmbauer et al. 2010), but we added three newly described species (*Lepidiolamprologus*  
262 *mimicus* (Schelly et al. 2007), *Neolamprologus timidus* (Kullander et al. 2014b) and  
263 *Chalinochromis cyanophleps* (Kullander et al. 2014a)). and 7 genes with partial coverage (4  
264 mitochondrial genes: 18S (21 species), COI (9 species), ND2 (77 species) and cytochrome b  
265 (43 species) and 3 nuclear genes: 38A (21 species), RH1 (33 species) and ednrb1 (21  
266 species)). Sequences were downloaded from GenBank using phyloGenerator (Pearse and  
267 Purvis 2013), and aligned with MAFFT using default settings (Katoh and Standley 2013).  
268 Genbank accession numbers for all used genes can be found in table S4. Substitution models  
269 for each gene were determined using PartitionFinder (Lanfear et al. 2012), yielding a shared  
270 substitution model for cytochrome b and COI (TN93+I+ $\Gamma$ ), the HKY+ $\Gamma$  model for 18S and  
271 38A, HKY+I for ednrb1, HKY+I+ $\Gamma$  for RH1 and TN93+I+ $\Gamma$  for ND2. As outgroup taxa we  
272 used the same species as used in Sturmbauer et al. 2010: 6 species from Lake Malawi, all  
273 members (4 species) of the *Eretmodini*, and 13 species from the C-lineage. For a full species  
274 list, see table S4.

275 In line with Sturmbauer et al. 2010 we applied 4 time calibrations: 0.57 - 1.0 million years for  
276 the Malawi clade, 5 - 6 million years for the *Lamprologini* clade, 5 - 6 million years for the  
277 C-lineage and 1.1 - 3.5 million years for the riverine *Lamprologini* species. All calibrations  
278 were implemented using a uniform prior distribution.

279 Using \*BEAST (Heled and Drummond 2010) within the BEAST 2 package (Bouckaert et al.  
280 2014), we inferred the time-calibrated species tree. We used a relaxed molecular clock with  
281 log-normally autocorrelated rates among branches. All priors were left at default settings,  
282 except for the tree prior, which was set to be a birth-death prior. The resulting MCMC chain  
283 contained ~1150M iterations. Convergence was assessed using ESS values (all > 100) and by

284 eye using AWTY (Nylander et al. 2008). We thinned the chain using the program  
285 LogCombiner (from the BEAST 2 suite) by selecting every 20,000<sup>th</sup> tree and removed the  
286 first 10% of the chain as burn-in. The resulting posterior sample consisted of 51800 trees.

287 Using TreeAnnotator (from the BEAST 2 suite) we constructed a Maximum Clade  
288 Credibility tree, storing the mean heights. Although this can sometimes lead to negative  
289 branch lengths, this was not the case for our *Lamprologini* tree.

290 We then pruned the tree to obtain the pure *Lamprologini* tree on which we fit our model. To  
291 prune the tree we removed all outgroup taxa and the riverine species using the function  
292 “drop.tip” from the ape package in R (Paradis et al. 2004).

293

#### 294 *Branching time uncertainty in the empirical tree*

295 To account for uncertainty in the estimates of branching times in the *Lamprologini* tree we  
296 sampled 100 trees from the posterior distribution obtained by \*BEAST. Sampling was  
297 performed at random, irrespective of the likelihood of the trees. Although ideally we would  
298 have liked to perform our analysis on the full posterior distribution, computational limitations  
299 forced us to only use a subset of the posterior distribution. In the Supplementary material we  
300 show that the distribution of summary statistics of the subset of 100 trees is similar to the  
301 distribution of the full collection of trees. The 100 sampled trees were, like the Maximum  
302 Clade Credibility tree, also pruned to remove the outgroup and riverine taxa and stored  
303 separately. For all 100 trees we performed both the ABC-SMC model selection algorithm and  
304 the ABC-SMC parameter estimation algorithm, to determine the impact of different  
305 branching times on the inferred water level model, and to determine whether the MCC tree is  
306 a good representation of the underlying variability.

307 Per tree we ran a single parameter estimation run, and 10 replicate model selection runs, each  
308 seeded with a different seed. We report the fraction of models selected across all 100 trees,  
309 where the model selected per tree, is the model being selected in the majority of replicates of  
310 that tree.

311

312 RESULTS

313 **Lamprologini phylogeny**

314

315 The onset of diversification within the *Lamprologini* is estimated to be around 5.45 MYA  
316 (95% HPD: [5, 5.92]), which is slightly earlier than previous estimates (5.28 MYA  
317 (Sturmbauer et al. 2010)). Species placement in the Maximum Clade Credibility tree is  
318 consistent with previous placement and/or taxonomic placement (figure 1). Placement of the  
319 *Altolamprologus* genus within the *Lamprologus callipterus* complex seems to re-iterate  
320 previously published evidence for introgressive hybridization between these species  
321 (Koblmüller et al. 2007). For the three species not previously included in the *Lamprologini*  
322 phylogeny *Lepidiolamprologus mimicus*, was placed within the other *Lepidiolamprologines*,  
323 *Chalinochromis cyanophleps* was placed as a sister species to *Julidochromis ornatus*, within  
324 the *Chalinochromis/Julidochromis* complex, and in agreement with previous analysis  
325 (Kullander et al. 2014b), *Neolamprologus timidus* is not placed as a sister species to  
326 *Neolamprologus furcifer*, but rather associates with *N. mondabu* and *N. falcicula*. In contrast  
327 to Gante et al. (2016), we place *N. olivaceous* outside the *Brichardi* complex. All other  
328 species in the *Brichardi* complex are inferred to be closely related, which is in agreement  
329 with the analysis by Gante et al., which is based on full genome sequences from only a small  
330 group of species, in contrast to the limited number of markers from a large number of species  
331 that we used.

332 As a reference we inferred speciation and extinction using the constant-rates birth-death  
333 model (Nee et al. 1994). Using Maximum Likelihood (the function `bd_ML` in the DDD  
334 package), we obtained an estimate of 1.004 for the speciation rate, and an estimate of 0.411  
335 for the extinction rate. Estimates for the birth-death model obtained during reconstruction of



336 the tree using BEAST could not be compared to our estimates here as these were obtained  
337 including the outgroups and riverine taxa.

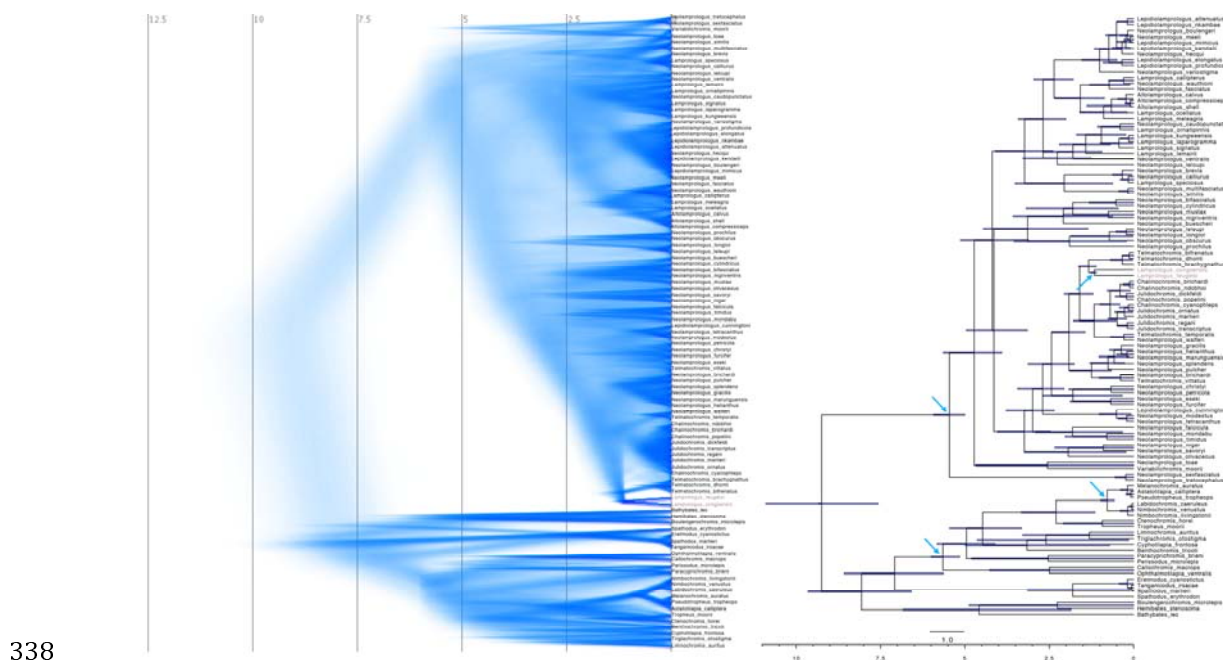

338

339 Figure 2. Phylogenetic hypothesis for the *Lamprologini* and outgroups, based on 3  
340 mitochondrial and 4 nuclear genes, and four calibrations (indicated by arrows): 0.57 - 1.0  
341 million years for the Malawi clade, 5 - 6 million years for the *Lamprologini* clade, 5-6 million  
342 years for the C-lineage and 1.1 - 3.5 million years for the riverine *Lamprologini* species. Left  
343 panel: Densitree representation of the MCMC chain obtained using \*BEAST. Shown are  
344 trees from the thinned posterior chain, after selecting every 20,000<sup>th</sup> tree, after removing 10%  
345 of the chain as burn in. Riverine species are indicated in grey. Right panel: Maximum Clade  
346 Credibility tree. The tree was reconstructed using four calibrations (indicated by arrows):  
347 0.57-1.0 million years for the Malawi clade, 5-6 million years for the *Lamprologini* clade, 5-6  
348 million years for the C-lineage and 1.1-3.5 million years for the riverine *Lamprologini*  
349 species. Bars around the node span the 95% HPD for each node. Riverine species are  
350 indicated in grey. Please note that the order of species is different between the two panels.

351

### 352 **Parameter estimation**

353 Firstly, we estimated parameter values for the relevant models for all 100 trees sampled from  
354 the posterior. We report the average parameter values across the combined posterior across  
355 all 100 trees. The model without water level changes resembles the constant-rates birth-death  
356 model, and we find that estimates for sympatric speciation at high water level ( $\lambda_s^h$ ) are

357 slightly higher than the estimated birth rate under the constant rates birth-death model (1.367  
358  $\text{My}^{-1}$  [0.599, 2.431] vs 1.001 respectively, see also Table 1). Similarly, we infer the extinction  
359 rate ( $\mu$ ) to also be slightly higher (0.796  $\text{My}^{-1}$  [0.001, 2.013] vs 0.411, see also Table 1).  
360 Accurately inferring extinction rates is difficult (Nee and Holmes 1994), even for the  
361 constant-rates birth-death model, and typically diversification ( $\lambda - \mu$ ) and turnover rates  
362 ( $\mu/\lambda$ ) are compared. We obtain estimates of 0.571 and 0.582 for diversification and turnover  
363 respectively, which are well in line with the estimates obtained using the constant rates birth-  
364 death model (a diversification rate of 0.59 and a turnover rate of 0.41 respectively). Taking  
365 into account the 95% confidence intervals on the obtained parameter estimates and the fact  
366 that the ABC-SMC estimates are potentially affected by the prior while the ML estimates are  
367 not, we are confident that the ABC-SMC method has inferred the correct parameter values  
368 for the model in the absence of water level changes.

369 Using the LW model, which implements water level changes following the literature (e.g.  
370 high water level until ~1.1 MYA, after which a series of water level changes took place), we  
371 infer a lower rate of sympatric speciation at high water level (0.571  $\text{My}^{-1}$ ), which is  
372 compensated with a high rate of allopatric speciation (13.326  $\text{My}^{-1}$ ) and sympatric speciation  
373 at low water level (2.894  $\text{My}^{-1}$ ), suggesting that water level dynamics are important drivers of  
374 biodiversity. Extinction is inferred to be low (0.050  $\text{My}^{-1}$ ).

375 Using the EW model, where water level changes are extrapolated to more than 1.1 MYA, we  
376 observe that the rate of sympatric speciation at high water level is inferred to be even higher  
377 than without water level changes (1.590  $\text{My}^{-1}$  [0.842, 2.371]). Extinction, however, is lower  
378 (0.171  $\text{My}^{-1}$  [0.001, 0.724]), and allopatric speciation and sympatric speciation at low water  
379 level are both inferred to be lower than for the literature water scenario (4.948  $\text{My}^{-1}$  and 0.069  
380  $\text{My}^{-1}$  respectively). This follows our expectations, given that with a higher number of water

381 level changes, the total time spent at low water level is higher, and too high rates of allopatric  
382 speciation and sympatric speciation at low water level would result in too much diversity.

383 Across all three water level models we observe that the distribution of the post-hoc  
384 perturbations  $\sigma$  differs considerably between the three scenarios: for the NW and EW model,  
385 especially values around  $\sigma = 1$  are avoided, and only extremely large, or very small values  
386 occur. This seems to indicate that there is either a need for a very low degree of perturbation  
387 (very low values of  $\sigma$ ), or for complete perturbation, which perturbs the node over the full  
388 available timescale (e.g. over the full distance between the parent and daughter node). For the  
389 LW model we observe a different pattern: predominantly high values of  $\sigma$ , which is possibly  
390 linked to high allopatric and sympatric speciation at low water rates, which generate  
391 branching times that are aligned in time. Correlating estimates for  $\sigma$ ,  $\lambda_a^l$  and  $\lambda_s^l$  for the LW  
392 and EW models we generally recover extremely low  $R^2$  values (all significant, but because of  
393 the high number of particles, significance is easily obtained), except for the LW model,  
394 where we recover an  $R^2$  of 0.14 for the correlation of  $\sigma \sim \lambda_a^l + \lambda_s^l$  ( $F$ -statistic: 8.279e4,  
395 999904 df,  $p$ -value  $< 2e-16$ ). This seems to indicate that there is an, albeit weak, relationship  
396 between a higher degree of perturbation and higher rates of allopatric and sympatric  
397 speciation at low water level.

398

399

400 Table 1. Mean posterior density estimate, for sympatric speciation at high water ( $\lambda_s^h$ ),  
 401 extinction ( $\mu$ ), perturbation ( $\sigma$ ), sympatric speciation at low water ( $\lambda_s^l$ ) and allopatric  
 402 speciation ( $\lambda_a^l$ ). Shown are results for the model with no water level changes (NW), literature  
 403 values for water level changes (LW) and waterlevel changes extrapolated beyond the  
 404 literature range (EW). The 95% credibility interval is shown between square brackets. All  
 405 values are rates per million years.

|    | $\lambda_s^h$        | $\mu$                | $\sigma$              | $\lambda_a^l$          | $\lambda_s^l$        |
|----|----------------------|----------------------|-----------------------|------------------------|----------------------|
| NW | 1.367 [0.599, 2.431] | 0.796 [0.001, 2.013] | 7.049 [0.001, 44.235] |                        |                      |
| LW | 0.571 [0.293, 0.905] | 0.050 [0.001, 0.218] | 0.121 [0.001, 0.537]  | 13.326 [0.001, 65.364] | 2.894 [0.001, 5.968] |
| EW | 1.590 [0.842, 2.371] | 0.171 [0.001, 0.724] | 0.043 [0.001, 0.170]  | 4.948 [0.001, 35.398]  | 0.069 [0.001, 0.281] |

406

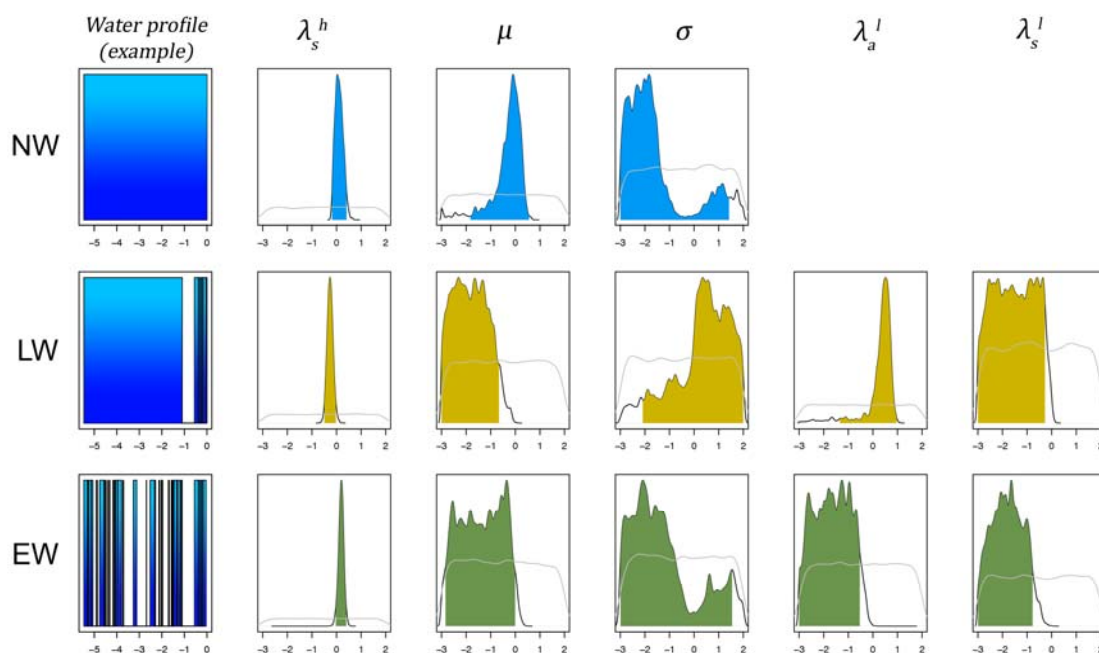

407

408 Figure 3. Posterior densities of the pooled posterior distribution across 100 randomly drawn  
 409 trees from the posterior MCMC chain. Shown are estimates for the three water level  
 410 scenarios (no water level changes (NW), literature values for water level changes (LW) and  
 411 extrapolated values for water level changes (EW)). Shown are the posterior density (black line), 95% credibility interval (shaded area, blue for NW, gold for LW and green for EW),  
 412 and the density of the prior (grey line). X-axes are on a 10-log scale. The first column shows  
 413 a sample water level profile, with the water level on the y-axis, and the time before present  
 414 (in million years) on the x-axis. Note that for the EW model, for each simulation a new  
 415 profile was generated, and that the shown profile is only one example of such a profile.  
 416 Because without water level changes,  $\lambda_s^l$  and  $\lambda_a^l$  have no meaning, their posterior distribution  
 417 is not plotted for the NW scenario.  
 418

419

420 **Model fitting**

421

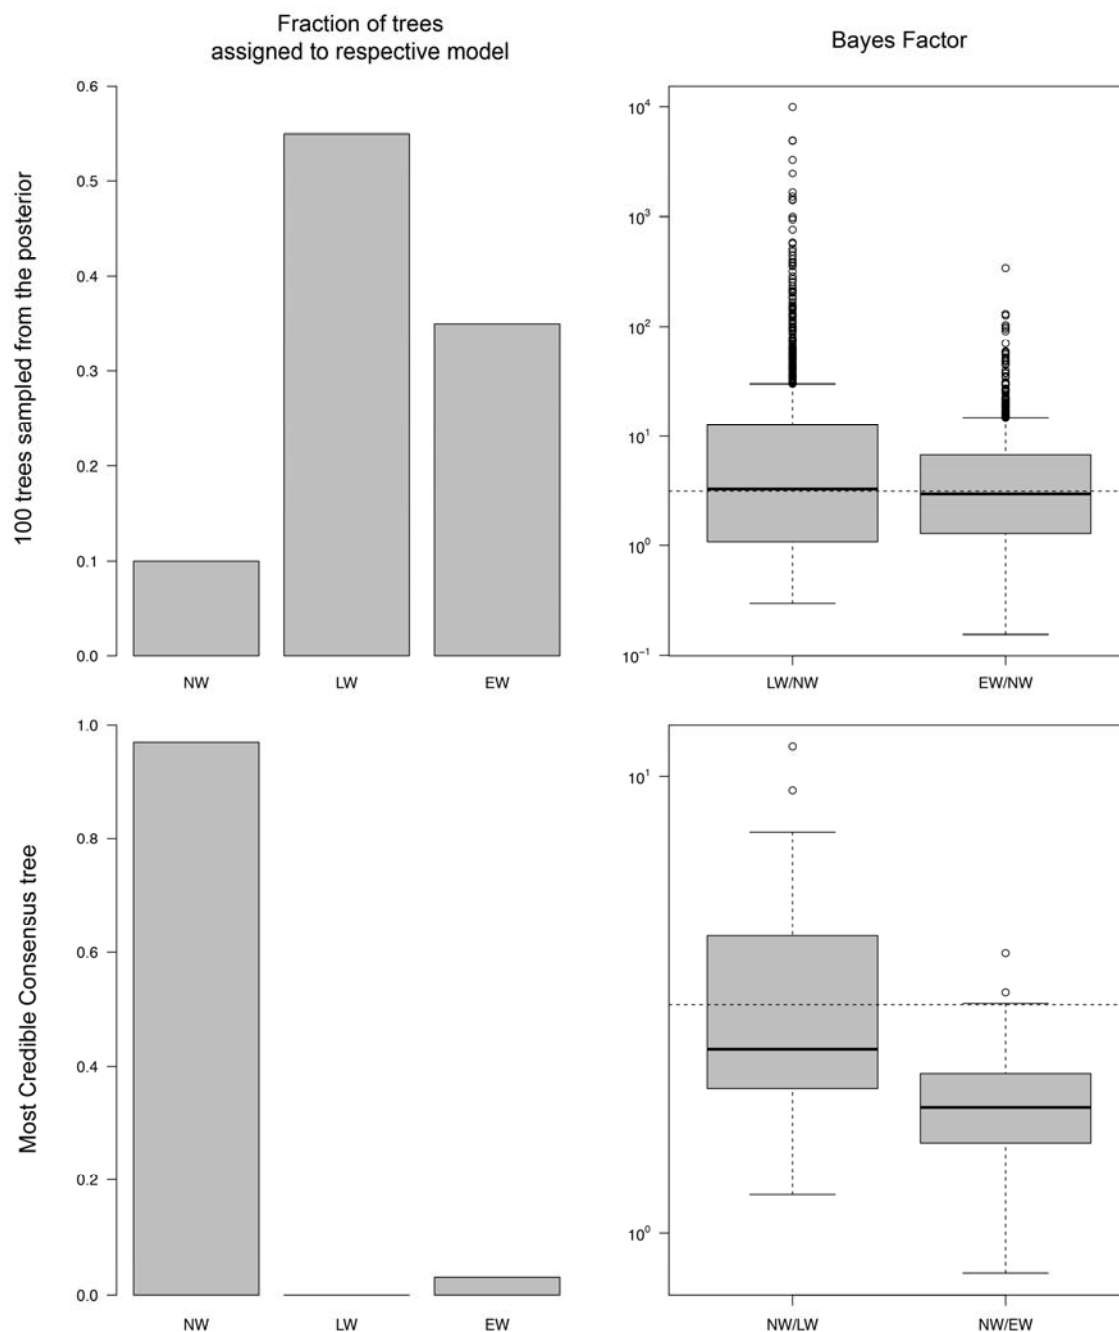

422

423 Figure 4. Model selection results on 100 trees drawn from the \*BEAST posterior of the  
424 *Lamprologini* tree (top row), and on the *Lamprologini* MCC tree (bottom row). The left  
425 column shows the fraction of trees for which model NW, LW or EW was selected (NW: no  
426 water level changes, LW: literature water level changes, EW: extrapolated water level  
427 changes). The right column shows the Bayes factor for the LW relative to the NW model, the  
428 EW model relative to the NW model and the Bayes factor for the EW model relative to the

429 LW model. The horizontal dotted line indicates a Bayes factor of  $10^{0.5}$ , above which support  
430 for the model in the numerator is considered to be high.

431

#### 432 *Model selection*

433 When we apply the model selection algorithm to each selected tree (10 replicate model  
434 selection inference per tree) (Figure 4, top row), we find that in 10 out of 100 trees, the NW  
435 model receives most particles in most replicates. In 55 out of 100 trees, the LW model has  
436 most particles, and for the remaining 35 trees, the EW model is selected. The large support  
437 for the LW model is reflected in the Bayes factors as well, with a mean Bayes factor of 71.2  
438 when comparing the LW model with the NW model, and a mean Bayes factor of 28.1 when  
439 comparing with the EW model. Using the Bayes factor interpretation of Jeffreys (1961),  
440 which postulates that any model with a Bayes factor higher than  $10^{0.5} = 3.16$ , has substantial  
441 support (and any model with a Bayes factor higher than  $10^{1.0} = 10$  is considered to have  
442 strong support), we find that the mean Bayes factors for the LW model strongly support the  
443 LW model over the other two models. Median Bayes factors are lower, suggesting a strongly  
444 skewed distribution (see also Figure 4, top row, right panel), with median Bayes factors of  
445 3.32 and 1.14 when comparing LW with NW and EW respectively. Support for the EW  
446 model over the NW model is high as well, with a mean Bayes factor of 16.22 (median 2.90).  
447 The low number of trees assigned to the NW model, and the high Bayes factors of the two  
448 other models when compared with the NW model together suggest that it is unlikely that  
449 branching patterns in the *Lamprologini* tree are caused by a model without water level  
450 changes.

451 When we apply the model selection algorithm to the MCC tree (100 independent runs)  
452 (Figure 4, bottom row), we find that in 97 out of 100 trees, the NW model receives most  
453 particles, and for the remaining 3 trees, the EW model is selected. Support for the NW model  
454 over the LW model is less overwhelming, with a mean Bayes factor of 3.36 (median 2.52).

455 Support for the NW model over the EW model is even less, with a Bayes factor of 1.92  
456 (median 1.87). These low Bayes factors suggest that within the replicates, the number of  
457 particles associated with the NW model was only marginally larger than the number of  
458 particles associated with the two other models. Nevertheless, we find that for the MCC tree,  
459 support for the LW and EW models is much lower than the support we found for trees  
460 sampled from the posterior.

461

462 *Validation of the model selection procedure*

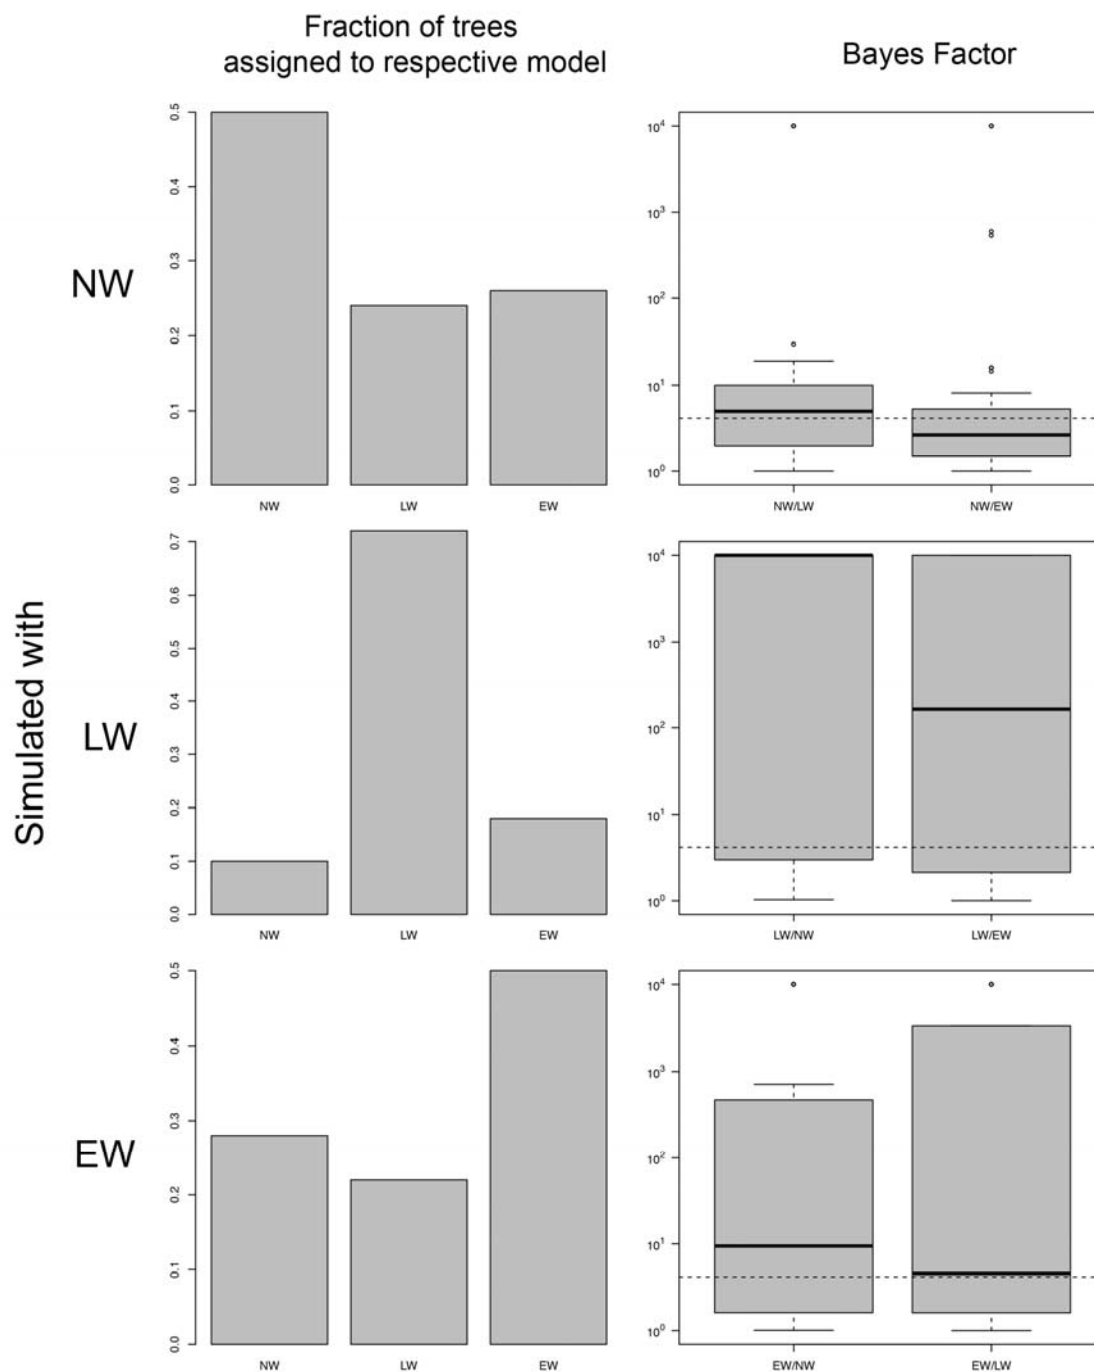

463

464 Figure 5. Validation of the ability of our ABC-SMC algorithm to infer the correct model. 50  
465 replicate datasets were generated for each water level model (no water level changes NW,  
466 water level changes from the literature LW, or water level changes extrapolated beyond the  
467 literature range, EW). The left column shows the fraction of trees for which the respective  
468 model was selected. The right column shows the distribution of Bayes factors for the model  
469 used to simulate the data compared to the other two models. To accommodate Bayes factors



470 of zero, shown is the transformation  $\log_{10}(\text{BF}+1)$  The horizontal dotted line indicates a Bayes  
471 factor of  $1+10^{0.5}$ , above which support for the model in the numerator is considered to be  
472 high.

473

474 Model validation shows that when we simulated data using the NW model, the NW model  
475 was selected using our model validation algorithm more than the other two models (25 out of  
476 50 replicates). The mean Bayes factors are both much higher than  $10^{0.5}$ , with a mean of 1024  
477 and 841 versus the LW and EW model respectively (medians: 4.00 and 1.67). When data was  
478 simulated with the LW model, we selected the correct model in the majority of 50 replicates  
479 (36 out of 50 replicates). The Bayes factors reflect this, with a mean of 5648 and 4224  
480 (medians: 10,000 and 163) versus the NW and EW model respectively. Lastly, when we  
481 simulated data using the EW model, we selected the correct model more than the other two  
482 models, in 25 out of 50 replicates. This was reflected by the Bayes factors as well, as the  
483 mean Bayes factor versus the NW model was 2323, and the mean Bayes factor versus the  
484 LW model was 2350 (medians: 8.43 and 3.55).

485

486

487 DISCUSSION

488 We have presented a model that infers past speciation and extinction rates, and their  
489 interactions with changes in the environment, from a given phylogeny. We have shown that  
490 our model is able to accurately select between different scenarios, including or excluding  
491 environmental change. We applied our model to a phylogeny of the cichlid fish tribe of  
492 *Lamprologini* and found evidence that past water level changes have shaped current cichlid  
493 diversity in Lake Tanganyika, when we applied our model to a sample from the posterior  
494 distribution of trees of the *Lamprologini*, as inferred by \*BEAST. We asked the model to  
495 select the best fitting of three scenarios: a scenario without any water level changes, a  
496 scenario using the values found in the literature, and a scenario using the mean rate of water  
497 level change found in the literature to extrapolate water level changes beyond the range of  
498 literature values available. We found that the model following literature water levels received  
499 most support, closely followed by the model extrapolating water level changes beyond the  
500 range of literature values. These results together indicate convincingly that the  
501 nullhypothesis, no effect of water level changes, should be rejected.

502

503 When we applied our model selection algorithm on the Most Credible Consensus (MCC)  
504 tree, we found highly contrasting results. Support for both models including water level  
505 changes diminished, and posterior support for the model without any water level changes  
506 increased dramatically. We conclude therefore that the MCC tree, at least for the  
507 *Lamprologini*, but probably more generally, provides a poor summary of the true species tree  
508 and of the underlying variation in branching patterns. Hence, we suggest to avoid reporting  
509 MCC trees, and instead to provide the reader with the full posterior distribution, for instance  
510 through a DensiTree plot. Posterior inference, for instance of speciation and extinction rates

511 should preferentially also be performed on multiple independent samples from the posterior,  
512 rather than on the MCC tree, as the underlying variation might lead to very different results,  
513 as we have shown.

514

515 When allopatric speciation rates are high, the resulting phylogenetic trees have internal nodes  
516 that have synchronized branching times, e.g. branching times that align with episodes of  
517 water level change. Phylogenetic reconstruction software does not allow for the alignment of  
518 branching times, and prior models used in phylogenetic reconstruction software explicitly  
519 exclude this. Our finding of evidence for a substantial role of habitat dynamics in  
520 diversification can therefore be regarded as conservative.

521 To improve the fit of trees generated by our model with trees generated by \*BEAST we  
522 included an *a posteriori* perturbation parameter in our model. This parameter determines the  
523 standard deviation of a Gaussian perturbation kernel that is applied to each node after the  
524 simulation has completed. By perturbing each node, we ensured that branching times no  
525 longer align in time. A less *ad hoc* solution to deal with the alignment of branching times in  
526 the tree would be to incorporate the model presented here as a tree prior in phylogenetic  
527 reconstruction software. Although this need not introduce any significant differences in the  
528 tree topology, the distribution of branching times could be substantially influenced, and any  
529 subsequent inference focusing on such patterns could be very different. Including such  
530 models in tree reconstruction software may require incorporation of ABC methods, and will  
531 be extremely computationally demanding, but our results justify such an endeavor.

532

533 Although we refer in our model to the different implementations of speciation as sympatric  
534 and allopatric, care should be taken in interpreting these forms of speciation. We consider  
535 here allopatric speciation only on a large scale, where populations become allopatric over  
536 stretches of hundreds of kilometers (Sturmbauer et al. 2001). Large-scale isolation might not  
537 be necessary for cichlids, as some species can already be limited in gene flow by a sand  
538 stretch of 50 meters separating populations (Rico and Turner 2002). Such micro-allopatric  
539 speciation events are not captured by the allopatric speciation rate in our model. Rather, these  
540 local scale events are captured in our model by sympatric speciation. Hence, sympatric  
541 speciation in our model covers all degrees of speciation ranging from full sympatry to  
542 allopatry, providing that geographical isolation is smaller than that imposed by a water level  
543 change. Allopatric speciation in our model then solely refers to speciation events caused by  
544 geographical isolation over a large distance, driven by changes in water level, and inducing  
545 simultaneous branching events.

546 Our results are strongly in line with population genomic analyses in a number of cichlid  
547 species including *Eretmodus cyanostictus* (Verheyen et al. 1996), *Tropheus moorii*  
548 (Koblmüller et al. 2011; Nevado et al. 2013) and *Variabilichromis moorii* (Nevado et al.  
549 2013), and resonate with population genomic findings across the three African Rift Lakes  
550 (Sturmbauer et al. 2001). Furthermore, population genetic studies have shown that water  
551 level fluctuations in Lake Malawi have been associated with population expansion in cichlid  
552 species (Arnegard et al. 1999; Sturmbauer et al. 2001; Genner et al. 2010), suggesting a  
553 potential role for water level changes in Lake Malawi as well. Considering that the geological  
554 record of Lake Malawi spans a much larger part of the total lifespan of the lake (Delvaux  
555 1995; Lyons et al. 2015; Ivory et al. 2016), and we thus have much better information about  
556 water level fluctuations since the colonization of the lake by cichlids, we expect that modern

557 genetic developments will soon allow for a thorough understanding of the impact of water  
558 level changes on cichlids in Lake Malawi as well.

559

560 Our results potentially clarify previously recovered inconsistencies when studying  
561 diversification, for example in shrews in the Philippines. The Philippines have been subject to  
562 strong sea level fluctuations, causing the fission and fusion of several islands, primarily  
563 during the Pleistocene (Brown et al. 2013). Population genetic evidence has convincingly  
564 shown that the location of such fused islands correlates strongly with genetic divergence  
565 between populations in many different species (Evans et al. 2003; Linkem et al. 2010; Siler et  
566 al. 2010; Oaks et al. 2013). Phylogenetic analysis however, has failed to show any evidence  
567 of diversification associated with Pleistocene water level changes (Esselstyn and Brown  
568 2009). The basis for this phylogenetic analysis however, was an MCC tree, for which we  
569 could also not find convincing evidence of water level changes driving diversification in  
570 cichlids. Repeating the analysis on the posterior distribution underlying the MCC tree could  
571 mitigate these problems, and could clarify the impact of Pleistocene water level changes on  
572 diversification in the Philippines archipelago.

573 *Conclusion*

574 Our model integrates standard constant-rate birth-death mechanics with environmental  
575 change and with speciation induced by geographical isolation. We analyzed the phylogeny of  
576 the tribe of *Lamprologini* to see whether past water level changes in Lake Tanganyika have  
577 contributed to the current diversity of cichlid fish in Lake Tanganyika. We find an important  
578 role for environmental changes in driving diversity, and find strong evidence that past water  
579 level changes have shaped current standing diversity in the tribby of *Lamprologini*. However,  
580 we found that inference of past environmental changes from a single phylogeny, and more

581 specifically, from the MCC tree, tends to lead to unreliable results. We therefore advocate  
582 caution when using the MCC tree as a basis for further analysis. Furthermore, we argue for  
583 the inclusion of more detailed branching models in phylogenetic reconstruction software,  
584 which allow for the inclusion of an interaction between the environment, and speciation rates.

585

#### 586 Acknowledgements

587 We would like to thank Lucas Molleman for useful discussions. We thank the Netherlands  
588 Organisation for Scientific Research (NWO) for financial support through VIDI and VICI  
589 grants awarded to RSE. We thank the Donald Smits Center for information Technology of  
590 the University of Groningen for their support and providing access to the Millipede high-  
591 performance computing cluster. We thank the Max Planck Institute for Evolutionary Theory  
592 for their support and providing access to their high-performance computing cluster.

593

594 REFERENCES

- 595 Aguilée R., Claessen D., Lambert A. 2013. Adaptive radiation driven by the interplay of eco-  
596 evolutionary and landscape dynamics. *Evolution* (N. Y). 67:1291–1306.
- 597 Aguilée R., Lambert A., Claessen D. 2011. Ecological speciation in dynamic landscapes. *J. Evol.*  
598 *Biol.* 24:2663–77.
- 599 Alin S., Cohen A., Bills R. 1999. Effects of landscape disturbance on animal communities in Lake  
600 Tanganyika, East Africa. *Conservation*. 13:1017–1033.
- 601 Alin S., Cohen A.S. 2003. Lake-level history of Lake Tanganyika, East Africa, for the past 2500 years  
602 based on ostracode-inferred water-depth reconstruction. *Palaeogeogr. Palaeoclimatol.*  
603 *Palaeoecol.* 199:31–49.
- 604 Arnegard M.E., Markert J.A., Danley P.D., Stauffer J.R., Ambali A.J., Kocher T.D. 1999. Population  
605 structure and colour variation of the cichlid fishes *Labeotropheus fuelleborni* Ahl along a  
606 recently formed archipelago of rocky habitat patches in southern Lake Malawi. *Proc. R. Soc.*  
607 *Lond. B.* 266:119–130.
- 608 Barnosky A. 2005. Effects of Quaternary climatic change on speciation in mammals. *J. Mamm. Evol.*  
609 12:247–264.
- 610 Bouckaert R., Heled J., Kühnert D., Vaughan T., Wu C.H., Xie D., Suchard M.A., Rambaut A.,  
611 Drummond A.J. 2014. BEAST 2: A Software Platform for Bayesian Evolutionary Analysis.  
612 *PLoS Comput. Biol.* 10:1–6.
- 613 Brown R.M., Siler C.D., Oliveros C.H., Esselstyn J. a., Diesmos A.C., Hosner P. a., Linkem C.W.,  
614 Barley A.J., Oaks J.R., Sanguila M.B., Welton L.J., Blackburn D.C., Moyle R.G., Townsend  
615 Peterson a., Alcalá A.C. 2013. Evolutionary processes of diversification in a model island  
616 archipelago. *Annu. Rev. Ecol. Evol. Syst.* 44:411–435.
- 617 Cohen A.S., Lezzar K.E., Tiercelin J.J., Soreghan M. 1997a. New palaeogeographic and lake-level  
618 reconstructions of Lake Tanganyika: implications for tectonic, climatic and biological evolution  
619 in a rift lake. *Basin Res.* 9:107–132.
- 620 Cohen A.S., Soreghan M., Scholz C.A. 1993. Estimating the age of formation of lakes: an example  
621 from Lake Tanganyika, East African Rift system. *Geology.* 21:511.
- 622 Cohen A.S., Stone J.R., Beuning K.R.M., Park L.E., Reinthal P.N., Dettman D., Scholz C.A., Johnson  
623 T.C., King J.W., Talbot M.R., Brown E.T., Ivory S.J. 2007. Ecological consequences of early  
624 Late Pleistocene megadroughts in tropical Africa. *Proc. Natl. Acad. Sci.* 104:16422–7.
- 625 Cohen A.S., Talbot M.R., Awramik S.M., Dettman D.L., Abell P. 1997b. Lake level and  
626 paleoenvironmental history of Lake Tanganyika, Africa, as inferred from late Holocene and  
627 modern stromatolites. *Geol. Soc. Am. Bull.* 109:444–460.
- 628 Coyne J., Orr H. 2004. *Speciation*. Sunderland, Massachusetts U.S.A.: Sinauer Associates.
- 629 Day J.J., Santini S., Garcia-Moreno J. 2007. Phylogenetic relationships of the Lake Tanganyika  
630 cichlid tribe Lamprologini: the story from mitochondrial DNA. *Mol. Phylogenet. Evol.* 45:629–  
631 42.
- 632 Delvaux D. 1995. Age of Lake Malawi (Nyasa) and water level fluctuations. *Mus. roy. Afr. centr.,*  
633 *Tervuren (Belg.), Dept. Geol. Min., Rapp. ann.* 1993 1994. 108:99–108.
- 634 Esselstyn J.A., Brown R.M. 2009. The role of repeated sea-level fluctuations in the generation of  
635 shrew (Soricidae: Crocidura) diversity in the Philippine Archipelago. *Mol. Phylogenet. Evol.*  
636 53:171–181.
- 637 Etienne R.S., Haegeman B., Stadler T., Aze T., Pearson P.N., Purvis A., Phillimore A.B. 2012.  
638 Diversity-dependence brings molecular phylogenies closer to agreement with the fossil record.  
639 *Proc. R. Soc. B Biol. Sci.* 279:1300–1309.

- 640 Etienne R.S., Rosindell J. 2012. Prolonging the past counteracts the pull of the present: protracted  
641 speciation can explain observed slowdowns in diversification. *Syst. Biol.* 61:204–13.
- 642 Evans B.J., Brown R.M., McGuire J.A., Supriatna J., Andayani N., Diesmos A., Iskandar D., Melnick  
643 D.J., Cannatella D.C. 2003. Phylogenetics of fanged frogs: testing biogeographical hypotheses at  
644 the interface of the asian and Australian faunal zones. *Syst. Biol.* 52:794–819.
- 645 Gante H.F., Matschiner M., Malmstrøm M., Jakobsen K.S., Jentoft S., Salzburger W. 2016. Genomics  
646 of speciation and introgression in Princess cichlid fishes from Lake Tanganyika. *Mol. Ecol.*
- 647 Genner M.J., Knight M.E., Haesler M.P., Turner G.F. 2010. Establishment and expansion of Lake  
648 Malawi rock fish populations after a dramatic Late Pleistocene lake level rise. *Mol. Ecol.*  
649 19:170–82.
- 650 Glor R.E., Gifford M.E., Larson A., Losos J.B., Schettino L.R., Chamizo Lara A.R., Jackman T.R.  
651 2004. Partial island submergence and speciation in an adaptive radiation: a multilocus analysis  
652 of the Cuban green anoles. *Proc. R. Soc. B Biol. Sci.* 271:2257–65.
- 653 Heled J., Drummond A.J. 2010. Bayesian Inference of Species Trees from Multilocus Data. *Mol.*  
654 *Biol. Evol.* 27:570–580.
- 655 Hutter C.R., Guayasamin J.M., Wiens J.J. 2013. Explaining Andean megadiversity: The evolutionary  
656 and ecological causes of glassfrog elevational richness patterns. *Ecol. Lett.* 16:1135–1144.
- 657 Ivory S.J., Blome M.W., King J.W., McGlue M.M., Cole J.E., Cohen A.S. 2016. Environmental  
658 change explains cichlid adaptive radiation at Lake Malawi over the past 1.2 million years. *Proc.*  
659 *Natl. Acad. Sci.*:201611028.
- 660 Janzen T., Höhna S., Etienne R.S. 2015. Approximate Bayesian Computation of diversification rates  
661 from molecular phylogenies: introducing a new efficient summary statistic, the nLTT. *Methods*  
662 *Ecol. Evol.* 6:566–575.
- 663 Jeffreys H. 1961. *The theory of probability.* Oxford University Press.
- 664 Katoh K., Standley D.M. 2013. MAFFT multiple sequence alignment software version 7:  
665 Improvements in performance and usability. *Mol. Biol. Evol.* 30:772–780.
- 666 Koblmüller S., Duftner N., Sefc K.M., Aibara M., Stipacek M., Blanc M., Egger B., Sturmbauer C.  
667 2007. Reticulate phylogeny of gastropod-shell-breeding cichlids from Lake Tanganyika--the  
668 result of repeated introgressive hybridization. *BMC Evol. Biol.* 7:7.
- 669 Koblmüller S., Salzburger W., Obermüller B., Eigner E., Sturmbauer C., Sefc K.M. 2011. Separated  
670 by sand, fused by dropping water: habitat barriers and fluctuating water levels steer the  
671 evolution of rock-dwelling cichlid populations in Lake Tanganyika. *Mol. Ecol.* 20:2272–90.
- 672 Kraaijeveld K., Kraaijeveld-Smit F.J.L., Maan M.E. 2011. Sexual selection and speciation: the  
673 comparative evidence revisited. *Biol. Rev. Camb. Philos. Soc.* 86:367–77.
- 674 Kullander S.O., Karlsson M., Norén M. 2014a. *Chalinochromis cyanophleps*, a new species of cichlid  
675 fish (Teleostei: Cichlidae) from Lake Tanganyika. *Zootaxa.* 3790:425–438.
- 676 Kullander S.O., Norén M., Karlsson M., Karlsson M. 2014b. Description of *Neolamprologus timidus*,  
677 new species, and review of *N. furcifer* from Lake Tanganyika (Teleostei: Cichlidae).  
678 *Ichthyol.Explor.Freshwaters.* 24:301–328.
- 679 Lanfear R., Calcott B., Ho S.Y.W., Guindon S. 2012. PartitionFinder: Combined selection of  
680 partitioning schemes and substitution models for phylogenetic analyses. *Mol. Biol. Evol.*  
681 29:1695–1701.
- 682 Lezzar K.E., Tiercelin J.J., Batist M., Cohen A.S., Bandora T., Rensbergen P., Turdu C., Mifundu W.,  
683 Klerkx J. 1996. New seismic stratigraphy and Late Tertiary history of the North Tanganyika  
684 Basin, East African Rift system, deduced from multichannel and high-resolution reflection  
685 seismic data and piston core evidence. *Basin Res.* 8:1–28.
- 686 Linkem C.W., Hesed K.M., Diesmos A.C., Brown R.M. 2010. Species boundaries and cryptic lineage  
687 diversity in a Philippine forest skink complex (Reptilia; Squamata; Scincidae: Lygosominae).



- 688 Mol. Phylogenet. Evol. 56:572–585.
- 689 Lyons R.P., Scholz C.A., Cohen A.S., King J.W., Brown E.T., Ivory S.J., Johnson T.C., Deino A.L.,  
690 Reinthal P.N., Mcglue M.M., Blome M.W. 2015. Continuous 1.3-million-year record of East  
691 African hydroclimate, and implications for patterns of evolution and biodiversity. PNAS.:2–7.
- 692 Nee S., Holmes E. 1994. Extinction rates can be estimated from molecular phylogenies. Philos. Trans.  
693 Biol. Sci. 344:77–82.
- 694 Nee S., May R.M., Harvey P.H. 1994. The reconstructed evolutionary process. Philos. Trans. R. Soc.  
695 Lond. B. Biol. Sci. 344:305–11.
- 696 Nevado B., Mautner S., Sturmbauer C., Verheyen E. 2013. Water-level fluctuations and  
697 metapopulation dynamics as drivers of genetic diversity in populations of three Tanganyikan  
698 cichlid fish species. Mol. Ecol. 22:3933–48.
- 699 Nylander J.A.A., Wilgenbusch J.C., Warren D.L., Swofford D.L. 2008. AWTY (are we there yet?): A  
700 system for graphical exploration of MCMC convergence in Bayesian phylogenetics.  
701 Bioinformatics. 24:581–583.
- 702 Oaks J.R., Sukumaran J., Esselstyn J. a, Linkem C.W., Siler C.D., Holder M.T., Brown R.M. 2013.  
703 Evidence for climate-driven diversification? A caution for interpreting ABC inferences of  
704 simultaneous historical events. Evolution (N. Y). 67:991–1010.
- 705 Papadopoulou A., Knowles L.L. 2015. Genomic tests of the species-pump hypothesis: Recent island  
706 connectivity cycles drive population divergence but not speciation in Caribbean crickets across  
707 the Virgin Islands. Evolution (N. Y). 69:1501–1517.
- 708 Paradis E., Claude J., Strimmer K. 2004. APE: Analyses of Phylogenetics and Evolution in R  
709 language. Bioinformatics. 20:289–290.
- 710 Pearse W.D., Purvis A. 2013. phyloGenerator: An automated phylogeny generation tool for  
711 ecologists. Methods Ecol. Evol. 4:692–698.
- 712 Pigot A.L., Phillimore A.B., Owens I.P.F., Orme C.D.L. 2010. The shape and temporal dynamics of  
713 phylogenetic trees arising from geographic speciation. Syst. Biol. 59:660–73.
- 714 Pybus O., Harvey P. 2000. Testing macro–evolutionary models using incomplete molecular  
715 phylogenies. Proc. R. Soc. B Biol. Sci. 267:2267–72.
- 716 Rico C., Turner G.F. 2002. Extreme microallopatric divergence in a cichlid species from Lake  
717 Malawi. Mol. Ecol. 11:1585–90.
- 718 Schelly R., Takahashi T., Bills R., Hori M. 2007. The first case of aggressive mimicry among  
719 lamprologines in a new species of Lepidolamprologus (Perciformes: Cichlidae) from Lake  
720 Tanganyika. Zootaxa. 49:39–49.
- 721 Schweiger O., Klotz S., Durka W., Kühn I. 2008. A comparative test of phylogenetic diversity  
722 indices. Oecologia. 157:485–95.
- 723 Sedano R.E., Burns K.J. 2010. Are the Northern Andes a species pump for Neotropical birds?  
724 Phylogenetics and biogeography of a clade of Neotropical tanagers (Aves: Thraupini). J.  
725 Biogeogr. 37:325–343.
- 726 Seehausen O. 2006. African cichlid fish: a model system in adaptive radiation research. Proc. R. Soc.  
727 B Biol. Sci. 273:1987–98.
- 728 Siler C.D., Oaks J.R., Esselstyn J.A., Diesmos A.C., Brown R.M. 2010. Phylogeny and biogeography  
729 of Philippine bent-toed geckos (Gekkonidae: Cyrtodactylus) contradict a prevailing model of  
730 Pleistocene diversification. Mol. Phylogenet. Evol. 55:699–710.
- 731 Sturmbauer C., Baric S., Salzburger W., Rüber L., Verheyen E. 2001. Lake level fluctuations  
732 synchronize genetic divergences of cichlid fishes in African lakes. Mol. Biol. Evol. 18:144–54.
- 733 Sturmbauer C., Salzburger W., Duftner N., Schelly R., Koblmüller S. 2010. Evolutionary history of  
734 the Lake Tanganyika cichlid tribe Lamprologini (Teleostei: Perciformes) derived from

- 735 mitochondrial and nuclear DNA data. *Mol. Phylogenet. Evol.* 57:266–84.
- 736 Taylor M.I., Rüber L., Verheyen E. 2001. Microsatellites reveal high levels of population  
737 substructuring in the species-poor Eretmodine cichlid lineage from Lake Tanganyika. *Proc. R.*  
738 *Soc. B Biol. Sci.* 268:803–8.
- 739 Thorpe R.S., Surget-Groba Y., Johansson H. 2008. The relative importance of ecology and  
740 geographic isolation for speciation in anoles. *Philos. Trans. R. Soc. Lond. B. Biol. Sci.*  
741 363:3071–81.
- 742 Toni T., Stumpf M.P.H. 2010. Simulation-based model selection for dynamical systems in systems  
743 and population biology. *Bioinformatics.* 26:104–110.
- 744 Toni T., Welch D., Strelkowa N., Ipsen A., Stumpf M.P.H. 2009. Approximate Bayesian computation  
745 scheme for parameter inference and model selection in dynamical systems. *J. R. Soc. Interface.*  
746 6:187–202.
- 747 Turner G.F., Seehausen O., Knight M.E., Allender C.J., Robinson R. 2001. How many species of  
748 cichlid fishes are there in African lakes? *Mol. Ecol.* 10:793–806.
- 749 Verheyen E., Rüber L., Snoeks J., Meyer A. 1996. Mitochondrial phylogeography of rock-dwelling  
750 cichlid fishes reveals evolutionary influence of historical lake level fluctuations of Lake  
751 Tanganyika, Africa. *Philos. Trans. R. Soc. Lond. B. Biol. Sci.* 351:797–805.
- 752 Weir J.T. 2006. Divergent Timing and Patterns of Species Accumulation in Lowland and Highland  
753 Neotropical Birds. *Evolution (N. Y.)*. 60:842–855.
- 754
- 755

756 Supplementary Information

757 *Summary statistics*

758 To show that the 100 trees sampled from the full posterior represent a reasonable subset of  
759 the full dataset, we compared the distribution of summary statistics for both datasets (e.g.,  
760 either all 51858 trees, or only 100 trees). For the ABC-SMC algorithm we made use of 4  
761 different summary statistics: number of tips, mean branch length (Phylogenetic Diversity  
762 (Schweiger et al. 2008)), the  $\gamma$  statistic (Pybus and Harvey 2000), and the normalized LTT  
763 statistic (Janzen et al. 2015). Because all trees have, by design, the same number of tips, and  
764 because the nLTT statistic only has meaning when compared to a specific tree, we only show  
765 results here for the mean branch length statistic, and the gamma statistic. Figure S1 shows  
766 that although the subset of 100 trees does not explore the full extremities of the full posterior  
767 distribution, the median and variance are highly similar between the two distributions.  
768 Furthermore, we find that summary statistics of the MCC tree (dotted line in Figure S1), are  
769 similar to the median for the mean branch length statistic, but are highly different for the  
770 gamma statistic.

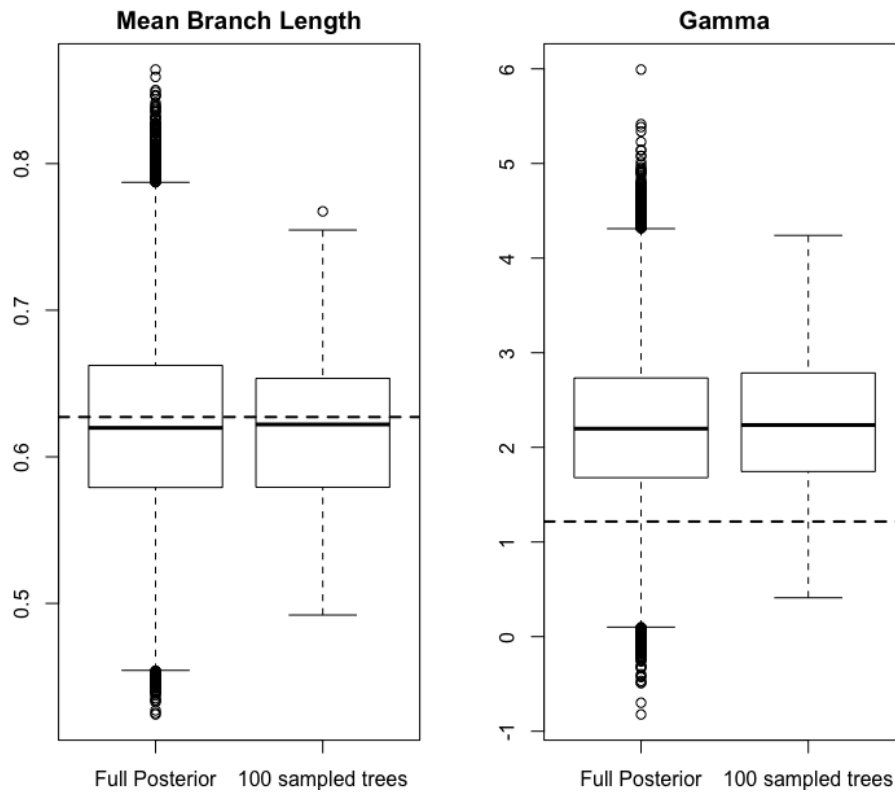

771

772 Figure S1. Comparison of the distribution of summary statistics for all trees from the  
773 \*BEAST posterior (“Full Posterior”), and for 100 trees randomly sampled from the posterior  
774 (“100 sampled trees”). Shown are results for the mean branch length statistic (left panel), and  
775 the gamma statistic (right panel). The dotted line shows the summary statistic for the Most  
776 Credible Consensus tree.
